# Supplementary material for: Mathematical pattern of Kessler psychological distress distribution in the general population of the U.S. and Japan
Source: BMC Psychiatry. 2021 Apr 10;21:188. doi: 10.1186/s12888-021-03198-y (PMC8035733; doi:10.1186/s12888-021-03198-y)
Supplement: Supplementary file 3 — Additional file 3. [file 12888_2021_3198_MOESM3_ESM.xlsx]

## Sheet: Sheet1
The K6 distributions for the four surveys
The number of cases						Relative frequencies
K6 scores	NHIS	NSDUH	BRFSS	CSLC		K6 scores	NHIS	NSDUH	BRFSS	CSLC
0	10059	8942	10501	80928		0	0.407527	0.217662	0.333344	0.403544
1	2829	4695	5045	21122		1	0.114613	0.114284	0.160149	0.104807
2	2752	4792	4444	18482		2	0.111494	0.116645	0.14107	0.0916515
3	1628	4061	2759	13334		3	0.0659563	0.0988511	0.0875817	0.0661619
4	1809	3495	2238	11426		4	0.0732893	0.0850738	0.0710431	0.0567158
5	990	2736	1382	9008		5	0.0401086	0.0665985	0.0438702	0.0446671
6	1028	2547	1148	11048		6	0.0416481	0.061998	0.0364421	0.0547577
7	630	1767	737	6585		7	0.0255236	0.0430115	0.0233953	0.0326775
8	625	1473	631	5364		8	0.0253211	0.0358551	0.0200305	0.0266212
9	372	1186	433	4336		9	0.0150711	0.0288691	0.0137452	0.0215439
10	387	1055	426	3634		10	0.0156788	0.0256803	0.013523	0.018041
11	273	867	344	2856		11	0.0110602	0.0211041	0.0109199	0.0142085
12	304	855	292	5073		12	0.0123162	0.020812	0.00926925	0.0251748
13	186	535	218	1634		13	0.00753555	0.0130227	0.0069202	0.00815216
14	178	446	171	1348		14	0.00721144	0.0108563	0.00542823	0.00668113
15	102	299	147	989		15	0.0041324	0.00727813	0.00466637	0.00491491
16	132	287	119	846		16	0.00534781	0.00698603	0.00377754	0.00424089
17	75	218	96	638		17	0.00303853	0.00530646	0.00304743	0.00317821
18	98	270	98	750		18	0.00397034	0.00657222	0.00311091	0.00375383
19	46	108	80	359		19	0.00186363	0.00262889	0.00253952	0.00177606
20	58	113	55	367		20	0.0023498	0.0027506	0.00174592	0.00182034
21	33	83	38	238		21	0.00133695	0.00202035	0.00120627	0.00117584
22	23	49	29	178		22	0.000931815	0.00119274	0.000920576	0.000890489
23	23	40	28	85		23	0.000931815	0.000973662	0.000888832	0.000423105
24	43	163	43	488		24	0.00174209	0.00396767	0.00136499	0.00242056
